# Supplementary material for: Association of Preterm Birth with Inflammatory Bowel Disease and Salivary Gland Disease: Machine Learning Analysis Using National Health Insurance Data
Source: MDPI journal article supplement (doi:10.3390/ijerph19053056), 2022-03-05

**Table S1.** ICD-10 Code for Preterm Birth, Inflammatory Bowel Disease and Salivary Gland Disease.

|       |       | Code   | Description                                                                              |
|-------|-------|--------|------------------------------------------------------------------------------------------|
| PTB   | PROM  | O42.00 | Onset of labor within 24 hours of rupture (0-33 weeks of gestation)                      |
|       |       | O42.01 | Onset of labor within 24 hours of rupture (34-36 weeks of gestation)                     |
|       |       | O42.10 | Onset of labor after 24 hours of rupture (0-33 weeks of gestation)                       |
|       |       | O42.11 | Onset of labor after 24 hours of rupture (34-36 weeks of gestation)                      |
|       |       | O42.20 | Prolonged labor because of treatment (0-33 weeks of gestation)                           |
|       |       | O42.21 | Prolonged labor because of treatment (34-36 weeks of gestation)                          |
|       |       | O42.90 | Unspecified length of time between rupture and onset of labor (0-33 weeks of gestation)  |
|       |       | O42.91 | Unspecified length of time between rupture and onset of labor (34-36 weeks of gestation) |
|       | PTL   | O60.11 | Preterm delivery with preterm labor (0-33 weeks of gestation)                            |
|       |       | O60.12 | Preterm delivery with preterm labor (34-36 weeks of gestation)                           |
|       |       | O60.19 | Preterm delivery with preterm labor (unspecified weeks of gestation)                     |
|       | Other | O60.31 | Preterm delivery without preterm labor (0-33 weeks of gestation)                         |
|       |       | O60.32 | Preterm delivery without preterm labor (34-36 weeks of gestation)                        |
|       |       | O60.39 | Preterm delivery without preterm labor (unspecified weeks of gestation)                  |
| Crohn |       | K50    | Crohn's disease                                                                          |
| UC    |       | K51    | Ulcerative colitis                                                                       |
| SG    |       | K11    | Salivary gland disease                                                                   |

Abbreviations: PTB Preterm Birth, PROM Premature Rupture of Membranes, PTL Preterm Labor with Preterm Delivery, UC Ulcerative Colitis, SG Salivary Gland Disease

**Table S2.** ATC Code for Medication.

| Medication              | Code  | Description                                       |                                                      |
|-------------------------|-------|---------------------------------------------------|------------------------------------------------------|
| Antidepressant          | N06A  | Antidepressants                                   |                                                      |
| Benzodiazepine          | N05BA | Benzodiazepine derivatives                        | (N05 Psychoanaleptics, N05B Anxiolytics)             |
|                         | N05CD | Benzodiazepine derivatives                        | (N05 Psychoanaleptics, N05C Hypnotics and sedatives) |
|                         | N05CF | Benzodiazepine-related drugs                      | (N05 Psychoanaleptics, N05C Hypnotics and sedatives) |
| Calcium Channel Blocker | C08   | Calcium channel blockers                          |                                                      |
| Nitrate                 | C01DA | Organic nitrates                                  |                                                      |
| Progesterone            | G03   | Sex hormones and modulators of the genital system |                                                      |
| Proton Pump Inhibitor   | A02BC | Proton pump inhibitors                            |                                                      |
| Sleeping Pills          | N05C  | Hypnotics and sedatives                           |                                                      |

**Table S3.** Descriptive Statistics on Preterm Birth and Its Determinants of All.

| <b>Variable</b>         | <i>No</i> | <i>Yes</i> | <i>Yes (%)</i> |
|-------------------------|-----------|------------|----------------|
| PTB 1 <sup>a</sup>      | 380231    | 21724      | 5.40           |
| PTB 2                   | 393030    | 8925       | 2.22           |
| PTB 3                   | 374212    | 27743      | 6.90           |
| PTB 4                   | 373120    | 28835      | 7.17           |
| Antidepressant          | 338934    | 63021      | 15.68          |
| Benzodiazepine          | 165738    | 236217     | 58.77          |
| Calcium Channel Blocker | 398218    | 3737       | 0.93           |
| Crohn's Disease_2002    | 401545    | 410        | 0.10           |
| Crohn's Disease_2003    | 401654    | 301        | 0.07           |
| Crohn's Disease_2004    | 401649    | 306        | 0.08           |
| Crohn's Disease_2005    | 401697    | 258        | 0.06           |
| Crohn's Disease_2006    | 401776    | 179        | 0.04           |
| Crohn's Disease_2007    | 401825    | 130        | 0.03           |
| Crohn's Disease_2008    | 401862    | 93         | 0.02           |
| Crohn's Disease_2009    | 401858    | 97         | 0.02           |
| Crohn's Disease_2010    | 401851    | 104        | 0.03           |
| Crohn's Disease_2011    | 401837    | 118        | 0.03           |
| Crohn's Disease_2012    | 401842    | 113        | 0.03           |
| Crohn's Disease_2013    | 401840    | 115        | 0.03           |
| Crohn's Disease_2014    | 401834    | 121        | 0.03           |
| Diabetes_2002           | 401091    | 864        | 0.21           |
| Diabetes_2003           | 400946    | 1009       | 0.25           |
| Diabetes_2004           | 400698    | 1257       | 0.31           |
| Diabetes_2005           | 400172    | 1783       | 0.44           |
| Diabetes_2006           | 400212    | 1743       | 0.43           |
| Diabetes_2007           | 400168    | 1787       | 0.44           |
| Diabetes_2008           | 400076    | 1879       | 0.47           |
| Diabetes_2009           | 399927    | 2028       | 0.50           |
| Diabetes_2010           | 399699    | 2256       | 0.56           |
| Diabetes_2011           | 399356    | 2599       | 0.65           |
| Diabetes_2012           | 398893    | 3062       | 0.76           |
| Diabetes_2013           | 397914    | 4041       | 1.01           |
| Diabetes_2014           | 395569    | 6386       | 1.59           |
| Hypertension_2002       | 401356    | 599        | 0.15           |
| Hypertension_2003       | 401327    | 628        | 0.16           |
| Hypertension_2004       | 401223    | 732        | 0.18           |
| Hypertension_2005       | 401060    | 895        | 0.22           |
| Hypertension_2006       | 400951    | 1004       | 0.25           |
| Hypertension_2007       | 400831    | 1124       | 0.28           |
| Hypertension_2008       | 400707    | 1248       | 0.31           |
| Hypertension_2009       | 400581    | 1374       | 0.34           |
| Hypertension_2010       | 400578    | 1377       | 0.34           |
| Hypertension_2011       | 400601    | 1354       | 0.34           |
| Hypertension_2012       | 400269    | 1686       | 0.42           |
| Hypertension_2013       | 400052    | 1903       | 0.47           |

|                         |        |        |       |
|-------------------------|--------|--------|-------|
| Hypertension_2014       | 399716 | 2239   | 0.56  |
| Myoma Uteri             | 384884 | 17071  | 4.25  |
| Nitrate                 | 400640 | 1315   | 0.33  |
| Prior Cone              | 401774 | 181    | 0.05  |
| Progesterone            | 307590 | 94365  | 23.48 |
| Proton Pump Inhibitor   | 276019 | 125936 | 31.33 |
| Region (City) in 2014   | 28602  | 373353 | 92.88 |
| Salivary Gland_2002     | 401612 | 343    | 0.09  |
| Salivary Gland_2003     | 401475 | 480    | 0.12  |
| Salivary Gland_2004     | 401368 | 587    | 0.15  |
| Salivary Gland_2005     | 401317 | 638    | 0.16  |
| Salivary Gland_2006     | 401184 | 771    | 0.19  |
| Salivary Gland_2007     | 401074 | 881    | 0.22  |
| Salivary Gland_2008     | 401008 | 947    | 0.24  |
| Salivary Gland_2009     | 400713 | 1242   | 0.31  |
| Salivary Gland_2010     | 400728 | 1227   | 0.31  |
| Salivary Gland_2011     | 400572 | 1383   | 0.34  |
| Salivary Gland_2012     | 400460 | 1495   | 0.37  |
| Salivary Gland_2013     | 400318 | 1637   | 0.41  |
| Salivary Gland_2014     | 400202 | 1753   | 0.44  |
| Sleeping Pills          | 370188 | 31767  | 7.90  |
| Ulcerative Colitis_2002 | 401793 | 162    | 0.04  |
| Ulcerative Colitis_2003 | 401750 | 205    | 0.05  |
| Ulcerative Colitis_2004 | 401777 | 178    | 0.04  |
| Ulcerative Colitis_2005 | 401761 | 194    | 0.05  |
| Ulcerative Colitis_2006 | 401786 | 169    | 0.04  |
| Ulcerative Colitis_2007 | 401769 | 186    | 0.05  |
| Ulcerative Colitis_2008 | 401760 | 195    | 0.05  |
| Ulcerative Colitis_2009 | 401747 | 208    | 0.05  |
| Ulcerative Colitis_2010 | 401718 | 237    | 0.06  |
| Ulcerative Colitis_2011 | 401714 | 241    | 0.06  |
| Ulcerative Colitis_2012 | 401690 | 265    | 0.07  |
| Ulcerative Colitis_2013 | 401654 | 301    | 0.07  |
| Ulcerative Colitis_2014 | 401631 | 324    | 0.08  |

Note: <sup>a</sup> PTB Preterm Birth during 2015-2017

|                              | <b>Min</b> | <b>Q1</b> | <b>Median</b> | <b>Q3</b> | <b>Max</b> |
|------------------------------|------------|-----------|---------------|-----------|------------|
| Age in 2014                  | 22         | 27        | 29            | 32        | 39         |
| Socioeconomic Status in 2014 | 1          | 8         | 12            | 15        | 20         |

**Table S4.** Descriptive Statistics on Preterm Birth and Its Determinants of Ulcerative-Colitis Group.

| <b>Variable</b>         | <i>No</i> | <i>Yes</i> | <i>Yes (%)</i> |
|-------------------------|-----------|------------|----------------|
| PTB 1 <sup>a</sup>      | 1677      | 105        | 5.89           |
| PTB 2                   | 1737      | 45         | 2.53           |
| PTB 3                   | 1648      | 134        | 7.52           |
| PTB 4                   | 1642      | 140        | 7.86           |
| Antidepressant          | 1336      | 446        | 25.03          |
| Benzodiazepine          | 431       | 1351       | 75.81          |
| Calcium Channel Blocker | 1754      | 28         | 1.57           |
| Diabetes_2002           | 1774      | 8          | 0.45           |
| Diabetes_2003           | 1776      | 6          | 0.34           |
| Diabetes_2004           | 1772      | 10         | 0.56           |
| Diabetes_2005           | 1768      | 14         | 0.79           |
| Diabetes_2006           | 1767      | 15         | 0.84           |
| Diabetes_2007           | 1762      | 20         | 1.12           |
| Diabetes_2008           | 1769      | 13         | 0.73           |
| Diabetes_2009           | 1769      | 13         | 0.73           |
| Diabetes_2010           | 1773      | 9          | 0.51           |
| Diabetes_2011           | 1763      | 19         | 1.07           |
| Diabetes_2012           | 1758      | 24         | 1.35           |
| Diabetes_2013           | 1751      | 31         | 1.74           |
| Diabetes_2014           | 1736      | 46         | 2.58           |
| Hypertension_2002       | 1776      | 6          | 0.34           |
| Hypertension_2003       | 1778      | 4          | 0.22           |
| Hypertension_2004       | 1776      | 6          | 0.34           |
| Hypertension_2005       | 1777      | 5          | 0.28           |
| Hypertension_2006       | 1779      | 3          | 0.17           |
| Hypertension_2007       | 1773      | 9          | 0.51           |
| Hypertension_2008       | 1776      | 6          | 0.34           |
| Hypertension_2009       | 1769      | 13         | 0.73           |
| Hypertension_2010       | 1773      | 9          | 0.51           |
| Hypertension_2011       | 1774      | 8          | 0.45           |
| Hypertension_2012       | 1767      | 15         | 0.84           |
| Hypertension_2013       | 1771      | 11         | 0.62           |
| Hypertension_2014       | 1768      | 14         | 0.79           |
| Myoma Uteri             | 1688      | 94         | 5.27           |
| Nitrate                 | 1773      | 9          | 0.51           |
| Prior Cone              | 1779      | 3          | 0.17           |
| Progesterone            | 1220      | 562        | 31.54          |
| Proton Pump Inhibitor   | 941       | 841        | 47.19          |
| Region (City) in 2014   | 138       | 1644       | 92.26          |
| Salivary Gland_2002     | 1779      | 3          | 0.17           |
| Salivary Gland_2003     | 1776      | 6          | 0.34           |
| Salivary Gland_2004     | 1777      | 5          | 0.28           |
| Salivary Gland_2005     | 1775      | 7          | 0.39           |
| Salivary Gland_2006     | 1779      | 3          | 0.17           |
| Salivary Gland_2007     | 1776      | 6          | 0.34           |

|                     |      |     |       |
|---------------------|------|-----|-------|
| Salivary Gland_2008 | 1773 | 9   | 0.51  |
| Salivary Gland_2009 | 1775 | 7   | 0.39  |
| Salivary Gland_2010 | 1774 | 8   | 0.45  |
| Salivary Gland_2011 | 1775 | 7   | 0.39  |
| Salivary Gland_2012 | 1774 | 8   | 0.45  |
| Salivary Gland_2013 | 1773 | 9   | 0.51  |
| Salivary Gland_2014 | 1774 | 8   | 0.45  |
| Sleeping Pills      | 1552 | 230 | 12.91 |

Note: <sup>a</sup> PTB Preterm Birth during 2015-2017

|                              | <b>Min</b> | <b>Q1</b> | <b>Median</b> | <b>Q3</b> | <b>Max</b> |
|------------------------------|------------|-----------|---------------|-----------|------------|
| Age in 2014                  | 22         | 27        | 30            | 33        | 39         |
| Socioeconomic Status in 2014 | 1          | 9         | 12            | 15        | 20         |

**Table S5.** Descriptive Statistics on Preterm Birth and Its Determinants of Crohn Group.

| <b>Variable</b>         | <i>No</i> | <i>Yes</i> | <i>Yes (%)</i> |
|-------------------------|-----------|------------|----------------|
| PTB 1 <sup>a</sup>      | 1863      | 91         | 4.66           |
| PTB 2                   | 1908      | 46         | 2.35           |
| PTB 3                   | 1825      | 129        | 6.60           |
| PTB 4                   | 1822      | 132        | 6.76           |
| Antidepressant          | 1465      | 489        | 25.03          |
| Benzodiazepine          | 465       | 1489       | 76.20          |
| Calcium Channel Blocker | 1925      | 29         | 1.48           |
| Diabetes_2002           | 1949      | 5          | 0.26           |
| Diabetes_2003           | 1946      | 8          | 0.41           |
| Diabetes_2004           | 1943      | 11         | 0.56           |
| Diabetes_2005           | 1938      | 16         | 0.82           |
| Diabetes_2006           | 1947      | 7          | 0.36           |
| Diabetes_2007           | 1946      | 8          | 0.41           |
| Diabetes_2008           | 1938      | 16         | 0.82           |
| Diabetes_2009           | 1933      | 21         | 1.07           |
| Diabetes_2010           | 1935      | 19         | 0.97           |
| Diabetes_2011           | 1938      | 16         | 0.82           |
| Diabetes_2012           | 1925      | 29         | 1.48           |
| Diabetes_2013           | 1924      | 30         | 1.54           |
| Diabetes_2014           | 1920      | 34         | 1.74           |
| Hypertension_2002       | 1948      | 6          | 0.31           |
| Hypertension_2003       | 1946      | 8          | 0.41           |
| Hypertension_2004       | 1949      | 5          | 0.26           |
| Hypertension_2005       | 1944      | 10         | 0.51           |
| Hypertension_2006       | 1941      | 13         | 0.67           |
| Hypertension_2007       | 1947      | 7          | 0.36           |
| Hypertension_2008       | 1944      | 10         | 0.51           |
| Hypertension_2009       | 1942      | 12         | 0.61           |
| Hypertension_2010       | 1942      | 12         | 0.61           |
| Hypertension_2011       | 1945      | 9          | 0.46           |
| Hypertension_2012       | 1938      | 16         | 0.82           |
| Hypertension_2013       | 1937      | 17         | 0.87           |
| Hypertension_2014       | 1939      | 15         | 0.77           |
| Myoma Uteri             | 1848      | 106        | 5.42           |
| Nitrate                 | 1938      | 16         | 0.82           |
| Prior Cone              | 1953      | 1          | 0.05           |
| Progesterone            | 1378      | 576        | 29.48          |
| Proton Pump Inhibitor   | 1037      | 917        | 46.93          |
| Region (City) in 2014   | 165       | 1789       | 91.56          |
| Salivary Gland_2002     | 1952      | 2          | 0.10           |
| Salivary Gland_2003     | 1953      | 1          | 0.05           |
| Salivary Gland_2004     | 1952      | 2          | 0.10           |
| Salivary Gland_2005     | 1948      | 6          | 0.31           |
| Salivary Gland_2006     | 1948      | 6          | 0.31           |
| Salivary Gland_2007     | 1947      | 7          | 0.36           |

|                     |      |     |       |
|---------------------|------|-----|-------|
| Salivary Gland_2008 | 1948 | 6   | 0.31  |
| Salivary Gland_2009 | 1948 | 6   | 0.31  |
| Salivary Gland_2010 | 1948 | 6   | 0.31  |
| Salivary Gland_2011 | 1945 | 9   | 0.46  |
| Salivary Gland_2012 | 1945 | 9   | 0.46  |
| Salivary Gland_2013 | 1944 | 10  | 0.51  |
| Salivary Gland_2014 | 1943 | 11  | 0.56  |
| Sleeping Pills      | 1705 | 249 | 12.74 |

Note: <sup>a</sup> PTB Preterm Birth during 2015-2017

|                              | <b>Min</b> | <b>Q1</b> | <b>Median</b> | <b>Q3</b> | <b>Max</b> |
|------------------------------|------------|-----------|---------------|-----------|------------|
| Age in 2014                  | 22         | 27        | 30            | 32        | 39         |
| Socioeconomic Status in 2014 | 1          | 8         | 12            | 15        | 20         |



**Table S6.** Descriptive Statistics on Preterm Birth and Its Determinants of Non-Inflammatory-Bowel-Disease Group.

| <b>Variable</b>         | <i>No</i> | <i>Yes</i> | <i>Yes (%)</i> |
|-------------------------|-----------|------------|----------------|
| PTB 1 <sup>a</sup>      | 376691    | 21528      | 5.41           |
| PTB 2                   | 389385    | 8834       | 2.22           |
| PTB 3                   | 370739    | 27480      | 6.90           |
| PTB 4                   | 369656    | 28563      | 7.17           |
| Antidepressant          | 336133    | 62086      | 15.59          |
| Benzodiazepine          | 164842    | 233377     | 58.61          |
| Calcium Channel Blocker | 394539    | 3680       | 0.92           |
| Diabetes_2002           | 397368    | 851        | 0.21           |
| Diabetes_2003           | 397224    | 995        | 0.25           |
| Diabetes_2004           | 396983    | 1236       | 0.31           |
| Diabetes_2005           | 396466    | 1753       | 0.44           |
| Diabetes_2006           | 396498    | 1721       | 0.43           |
| Diabetes_2007           | 396460    | 1759       | 0.44           |
| Diabetes_2008           | 396369    | 1850       | 0.46           |
| Diabetes_2009           | 396225    | 1994       | 0.50           |
| Diabetes_2010           | 395991    | 2228       | 0.56           |
| Diabetes_2011           | 395655    | 2564       | 0.64           |
| Diabetes_2012           | 395210    | 3009       | 0.76           |
| Diabetes_2013           | 394239    | 3980       | 1.00           |
| Diabetes_2014           | 391913    | 6306       | 1.58           |
| Hypertension_2002       | 397632    | 587        | 0.15           |
| Hypertension_2003       | 397603    | 616        | 0.15           |
| Hypertension_2004       | 397498    | 721        | 0.18           |
| Hypertension_2005       | 397339    | 880        | 0.22           |
| Hypertension_2006       | 397231    | 988        | 0.25           |
| Hypertension_2007       | 397111    | 1108       | 0.28           |
| Hypertension_2008       | 396987    | 1232       | 0.31           |
| Hypertension_2009       | 396870    | 1349       | 0.34           |
| Hypertension_2010       | 396863    | 1356       | 0.34           |
| Hypertension_2011       | 396882    | 1337       | 0.34           |
| Hypertension_2012       | 396564    | 1655       | 0.42           |
| Hypertension_2013       | 396344    | 1875       | 0.47           |
| Hypertension_2014       | 396009    | 2210       | 0.55           |
| Myoma Uteri             | 381348    | 16871      | 4.24           |
| Nitrate                 | 396929    | 1290       | 0.32           |
| Prior Cone              | 398042    | 177        | 0.04           |
| Progesterone            | 304992    | 93227      | 23.41          |
| Proton Pump Inhibitor   | 274041    | 124178     | 31.18          |
| Region (City) in 2014   | 28299     | 369920     | 92.89          |
| Salivary Gland_2002     | 397881    | 338        | 0.08           |
| Salivary Gland_2003     | 397746    | 473        | 0.12           |
| Salivary Gland_2004     | 397639    | 580        | 0.15           |
| Salivary Gland_2005     | 397594    | 625        | 0.16           |
| Salivary Gland_2006     | 397457    | 762        | 0.19           |

|                     |        |       |      |
|---------------------|--------|-------|------|
| Salivary Gland_2007 | 397351 | 868   | 0.22 |
| Salivary Gland_2008 | 397287 | 932   | 0.23 |
| Salivary Gland_2009 | 396990 | 1229  | 0.31 |
| Salivary Gland_2010 | 397006 | 1213  | 0.30 |
| Salivary Gland_2011 | 396852 | 1367  | 0.34 |
| Salivary Gland_2012 | 396741 | 1478  | 0.37 |
| Salivary Gland_2013 | 396601 | 1618  | 0.41 |
| Salivary Gland_2014 | 396485 | 1734  | 0.44 |
| Sleeping Pills      | 366931 | 31288 | 7.86 |

Note: <sup>a</sup> PTB Preterm Birth during 2015-2017

|                              | <b>Min</b> | <b>Q1</b> | <b>Median</b> | <b>Q3</b> | <b>Max</b> |
|------------------------------|------------|-----------|---------------|-----------|------------|
| Age in 2014                  | 22         | 27        | 29            | 32        | 39         |
| Socioeconomic Status in 2014 | 1          | 8         | 12            | 15        | 20         |

**Figure S1.** Average Values of Random Forest Variable Importance for PTB 1, PTB 2, PTB 3 and PTB 4: Ulcerative-Colitis Group.

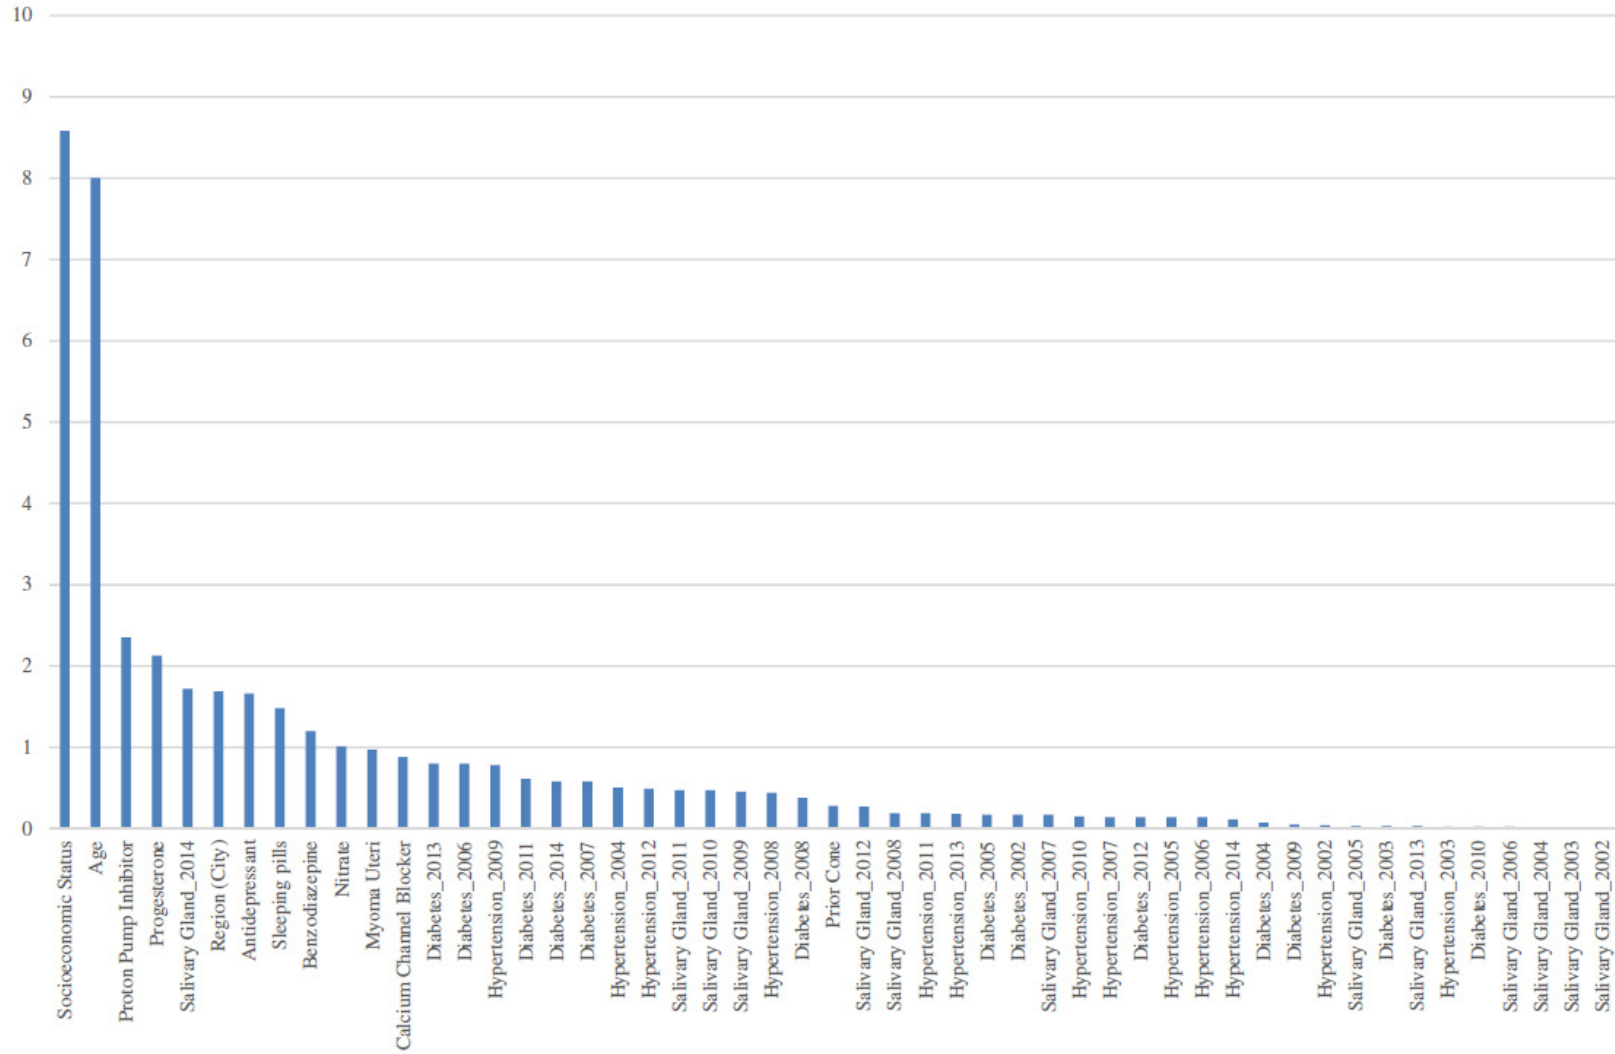

**Figure S2.** Average Values of Random Forest Variable Importance for PTB 1, PTB 2, PTB 3 and PTB 4: Crohn Group.

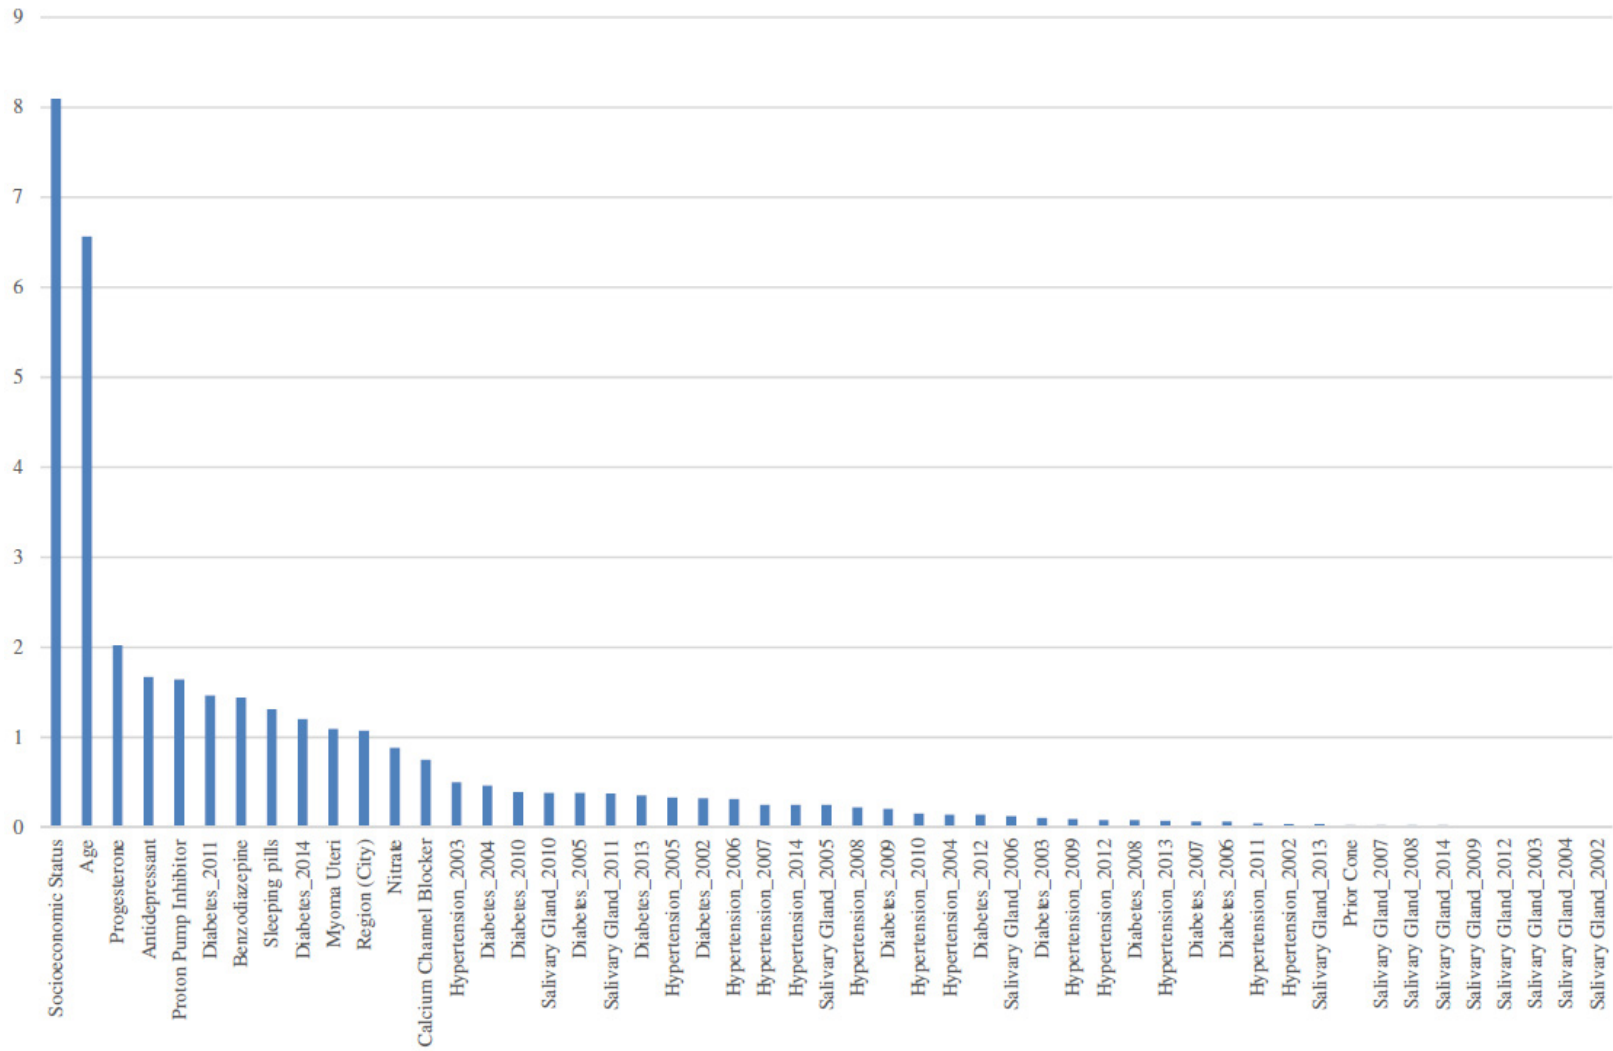

**Figure S3.** Average Values of Random Forest Variable Importance for PTB 1, PTB 2, PTB 3 and PTB 4: Non-Inflammatory-Bowel-Disease Group.

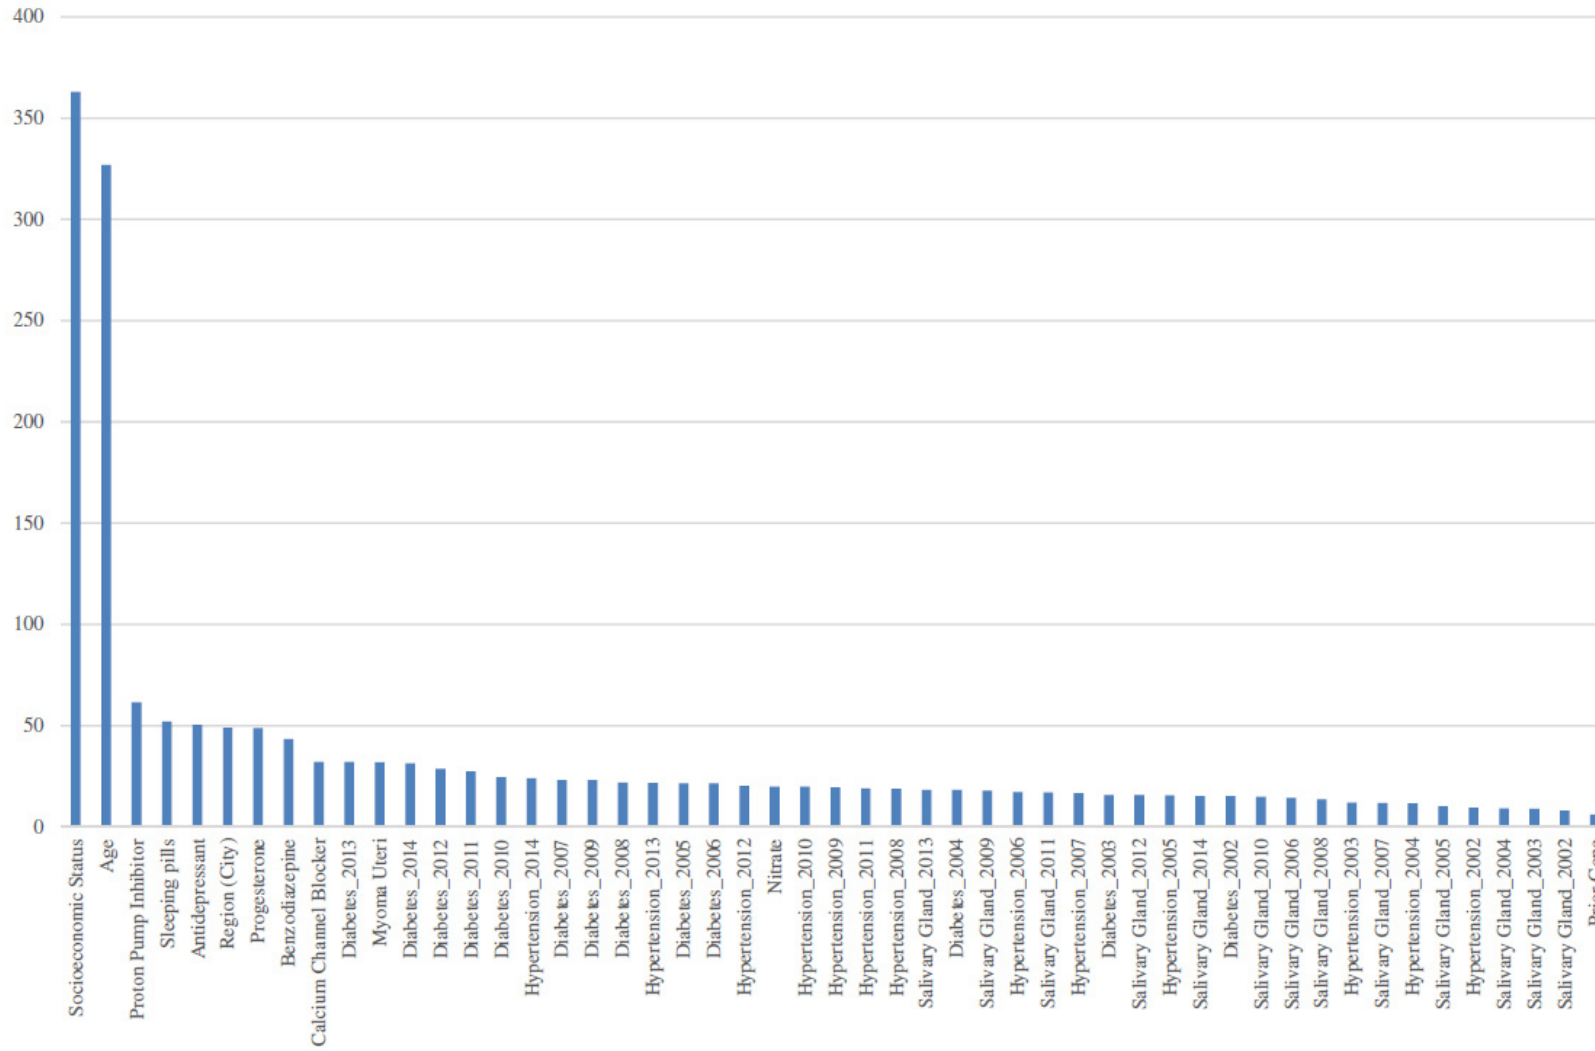

Supplement: s1 [file s1]
